# Supplementary material for: Improving Transferability of Introduced Species’ Distribution Models: New Tools to Forecast the Spread of a Highly Invasive Seaweed
Source: PubMed Central journal article supplement (PMC3732097; doi:10.1371/journal.pone.0068337), 2013-06-28
Supplement: pone.0068337.s001.pdf [file pone.0068337.s001.pdf]

**A. native range (Australia)**

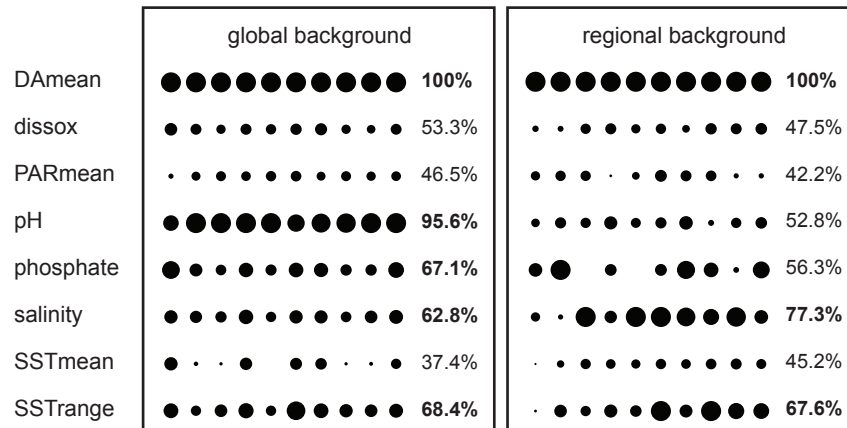

**B. invaded range (Europe)**

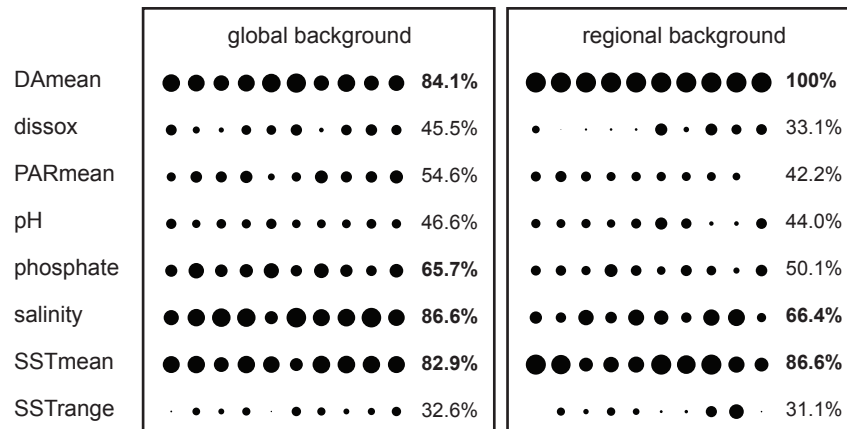

**Fig. S1:** Model surveying results indicating qualitatively similar results when analyses are carried out with global or regional backgrounds.
